# Supplementary material for: Kinetic fall-off behavior for the Cl + Furan-2,5-dione (C4H2O3, maleic anhydride) reaction
Source: Royal Society of Chemistry journal article supplement (doi:10.1039/d0cp06402e), 2021-01-01
Supplement: d0cp06402e1.pdf [file d0cp06402e1.pdf]

## Supplementary Information

### Kinetic fall-off behavior for the Cl + Furan-2,5-dione (C<sub>4</sub>H<sub>2</sub>O<sub>3</sub>, maleic anhydride) reaction

Aparajeo Chattopadhyay,<sup>1,2</sup> Tomasz Gierczak,<sup>1,2</sup> Paul Marshall,<sup>1,2,3</sup> Vassileios C. Papadimitriou,<sup>1,2</sup> and James B. Burkholder<sup>1,\*</sup>

<sup>1</sup> Chemical Sciences Laboratory, National Oceanic and Atmospheric Administration, 325 Broadway, Boulder, CO, USA 80305-3327

<sup>2</sup> Cooperative Institute for Research in Environmental Sciences, University of Colorado, Boulder, CO, USA 80309

<sup>3</sup> Department of Chemistry and Center for Advanced Scientific Computing and Modeling, University of North Texas, 1155 Union Circle #305070, Denton, Texas 76203, USA.

#### \*Correspondence

James B. Burkholder  
Chemical Sciences Laboratory,  
National Oceanic and Atmospheric Administration,  
325 Broadway, Boulder, CO 80305-3327  
Ph: 303-497-3252  
Email: James.B.Burkholder@noaa.gov

#### Present address

Tomasz Gierczak, Department of Chemistry, Warsaw University, al. Zwirki i Wigury 101, 02-089 Warszawa, Poland

Vassileios C. Papadimitriou, Laboratory of Photochemistry and Chemical Kinetics, Department of Chemistry, University of Crete, Vassilika Vouton, 71003 Heraklion, Crete, Greece.

**Table S1.** Summary of experimental conditions, fit parameters, and kinetic results obtained in this work for the Cl + C<sub>4</sub>H<sub>2</sub>O<sub>3</sub> (MA) ↔ C<sub>4</sub>H<sub>2</sub>O<sub>3</sub>Cl• (adduct) reaction with N<sub>2</sub> bath gas

| Temperature (K)                                  | Pressure (Torr, N <sub>2</sub> ) | [C <sub>4</sub> H <sub>2</sub> O <sub>3</sub> ] (10 <sup>14</sup> molecule cm <sup>-3</sup> ) | Q      | -λ <sub>1</sub> | -λ <sub>2</sub> | S <sub>0</sub> | k <sub>d</sub> (s <sup>-1</sup> ) | k <sub>loss</sub> (s <sup>-1</sup> ) | k <sub>r</sub> (10 <sup>-11</sup> cm <sup>3</sup> molecule <sup>-1</sup> s <sup>-1</sup> ) | k <sub>r</sub> (s <sup>-1</sup> ) | K <sub>p</sub> (10 <sup>6</sup> atm <sup>-1</sup> ) |
|--------------------------------------------------|----------------------------------|-----------------------------------------------------------------------------------------------|--------|-----------------|-----------------|----------------|-----------------------------------|--------------------------------------|--------------------------------------------------------------------------------------------|-----------------------------------|-----------------------------------------------------|
| 323                                              | 200                              | 1.10                                                                                          | 2813.9 | 5068.8          | 95.5            | 2016.5         | 15                                | 190                                  | 2.12                                                                                       | 2624                              | 0.184                                               |
|                                                  |                                  | 3.27                                                                                          | 3083.9 | 10240.9         | 122.1           | 1919.9         |                                   | 166                                  | 2.22                                                                                       | 2918                              | 0.173                                               |
|                                                  |                                  | 1.77                                                                                          | 3205.1 | 7293.5          | 107.3           | 1989.6         |                                   | 176                                  | 2.36                                                                                       | 3029                              | 0.178                                               |
|                                                  |                                  | 2.40                                                                                          | 3093.9 | 8123.3          | 107.9           | 1934.6         |                                   | 161                                  | 2.15                                                                                       | 2879                              | 0.170                                               |
|                                                  |                                  |                                                                                               |        |                 |                 |                |                                   |                                      |                                                                                            |                                   |                                                     |
|                                                  | 100                              | 3.51                                                                                          | 2667.1 | 8989.4          | 130.9           | 1125.1         | 118                               | 136                                  | 1.80                                                                                       | 2531                              | 0.162                                               |
|                                                  |                                  | 2.37                                                                                          | 2642.3 | 7491.9          | 138.2           | 1285.9         |                                   | 148                                  | 2.06                                                                                       | 2494                              | 0.188                                               |
|                                                  |                                  | 1.74                                                                                          | 2572.2 | 6170.0          | 130.0           | 1256.2         |                                   | 138                                  | 2.08                                                                                       | 2434                              | 0.194                                               |
|                                                  |                                  | 1.31                                                                                          | 2311.5 | 4785.3          | 141.8           | 1285.8         |                                   | 162                                  | 1.90                                                                                       | 2149                              | 0.201                                               |
|                                                  |                                  | 0.98                                                                                          | 2420.1 | 4493.1          | 140.3           | 1315.0         |                                   | 164                                  | 2.14                                                                                       | 2256                              | 0.216                                               |
|                                                  |                                  |                                                                                               |        |                 |                 |                |                                   |                                      |                                                                                            |                                   |                                                     |
|                                                  | 50                               | 5.39                                                                                          | 2195.5 | 9862.3          | 107.0           | 1322.0         | 80                                | 114                                  | 1.43                                                                                       | 2081                              | 0.156                                               |
|                                                  |                                  | 3.43                                                                                          | 2112.4 | 7305.0          | 104.0           | 1458.0         |                                   | 113                                  | 1.52                                                                                       | 1999                              | 0.173                                               |
|                                                  |                                  | 3.09                                                                                          | 2085.8 | 6529.5          | 103.7           | 1458.1         |                                   | 114                                  | 1.44                                                                                       | 1972                              | 0.166                                               |
|                                                  |                                  | 2.02                                                                                          | 2008.6 | 4848.9          | 105.8           | 1505.4         |                                   | 123                                  | 1.42                                                                                       | 1885                              | 0.171                                               |
|                                                  |                                  | 1.27                                                                                          | 1986.7 | 3893.9          | 102.5           | 1637.4         |                                   | 125                                  | 1.52                                                                                       | 1862                              | 0.186                                               |
|                                                  |                                  |                                                                                               |        |                 |                 |                |                                   |                                      |                                                                                            |                                   |                                                     |
|                                                  | 50                               | 2.51                                                                                          | 2005.8 | 5331.4          | 91.0            | 1383.5         | 51                                | 114                                  | 1.34                                                                                       | 1892                              | 0.161                                               |
|                                                  |                                  | 1.15                                                                                          | 1938.1 | 3565.2          | 83.9            | 1647.1         |                                   | 121                                  | 1.44                                                                                       | 1818                              | 0.181                                               |
|                                                  |                                  | 4.02                                                                                          | 1924.4 | 7042.1          | 91.2            | 1323.5         |                                   | 106                                  | 1.28                                                                                       | 1819                              | 0.161                                               |
|                                                  |                                  | 1.86                                                                                          | 2032.2 | 4869.7          | 90.4            | 1705.3         |                                   | 117                                  | 1.54                                                                                       | 1915                              | 0.183                                               |
|                                                  |                                  | 0.99                                                                                          | 2083.7 | 3530.8          | 85.9            | 1829.5         |                                   | 133                                  | 1.49                                                                                       | 1951                              | 0.174                                               |
|                                                  |                                  |                                                                                               |        |                 |                 |                |                                   |                                      |                                                                                            |                                   |                                                     |
|                                                  | 25                               | 7.72                                                                                          | 1673.8 | 10354.7         | 138.1           | 1015.8         | 170                               | 132                                  | 1.12                                                                                       | 1541                              | 0.165                                               |
|                                                  |                                  | 5.62                                                                                          | 1701.2 | 7668.3          | 146.4           | 1026.2         |                                   | 140                                  | 1.06                                                                                       | 1561                              | 0.154                                               |
|                                                  |                                  | 4.71                                                                                          | 1770.3 | 7486.7          | 154.9           | 1295.8         |                                   | 151                                  | 1.21                                                                                       | 1620                              | 0.170                                               |
|                                                  |                                  | 3.42                                                                                          | 1731.8 | 5821.3          | 150.9           | 1292.2         |                                   | 144                                  | 1.19                                                                                       | 1588                              | 0.170                                               |
|                                                  |                                  | 2.50                                                                                          | 1633.0 | 4418.4          | 157.0           | 1397.0         |                                   | 150                                  | 1.11                                                                                       | 1483                              | 0.170                                               |
|                                                  |                                  |                                                                                               |        |                 |                 |                |                                   |                                      |                                                                                            |                                   |                                                     |
|                                                  | 15                               | 10.99                                                                                         | 1393.4 | 11509.0         | 148.2           | 980.4          | 250                               | 136                                  | 0.911                                                                                      | 1257                              | 0.165                                               |
|                                                  |                                  | 10.63                                                                                         | 1329.8 | 9980.3          | 174.5           | 1077.2         |                                   | 164                                  | 0.807                                                                                      | 1165                              | 0.157                                               |
|                                                  |                                  | 9.32                                                                                          | 1463.6 | 9478.0          | 231.7           | 1117.8         |                                   | 229                                  | 0.858                                                                                      | 1235                              | 0.158                                               |
|                                                  |                                  | 2.47                                                                                          | 1333.5 | 3522.2          | 205.7           | 1640.8         |                                   | 182                                  | 0.867                                                                                      | 1151                              | 0.171                                               |
| Global fit: K <sub>p</sub> (323 K) = 0.17 ± 0.01 |                                  |                                                                                               |        |                 |                 |                |                                   |                                      |                                                                                            |                                   |                                                     |
| 308                                              | 500                              | 2.24                                                                                          | 2515.0 | 7623.8          | 1251.2          | 2069.4         | 250                               | 1458                                 | 2.73                                                                                       | 1057                              | 0.617                                               |
|                                                  |                                  | 1.83                                                                                          | 2502.8 | 6695.0          | 1159.8          | 1998.6         |                                   | 1399                                 | 2.79                                                                                       | 1103                              | 0.602                                               |
|                                                  |                                  | 1.30                                                                                          | 2392.5 | 5213.3          | 1020.9          | 2168.8         |                                   | 1315                                 | 2.76                                                                                       | 1077                              | 0.611                                               |
|                                                  |                                  |                                                                                               |        |                 |                 |                |                                   |                                      |                                                                                            |                                   |                                                     |
|                                                  | 200                              | 2.42                                                                                          | 1405.3 | 7406.4          | 187.8           | 2047.3         | 66                                | 212                                  | 2.53                                                                                       | 1193                              | 0.505                                               |
|                                                  |                                  | 2.14                                                                                          | 1341.2 | 6529.0          | 191.9           | 1947.9         |                                   | 219                                  | 2.49                                                                                       | 1122                              | 0.528                                               |
|                                                  |                                  | 1.46                                                                                          | 1364.4 | 5057.5          | 173.5           | 2061.9         |                                   | 207                                  | 2.60                                                                                       | 1157                              | 0.536                                               |
|                                                  |                                  | 1.22                                                                                          | 1326.8 | 4337.7          | 182.3           | 2088.4         |                                   | 225                                  | 2.56                                                                                       | 1102                              | 0.554                                               |
|                                                  |                                  | 0.64                                                                                          | 1324.4 | 3090.3          | 195.7           | 2118.9         |                                   | 273                                  | 2.95                                                                                       | 1051                              | 0.669                                               |
|                                                  |                                  |                                                                                               |        |                 |                 |                |                                   |                                      |                                                                                            |                                   |                                                     |
|                                                  | 100                              | 4.64                                                                                          | 1152.2 | 11736.6         | 125.6           | 1103.8         | 96                                | 128                                  | 2.28                                                                                       | 1024                              | 0.532                                               |
|                                                  |                                  | 3.84                                                                                          | 1197.0 | 9458.5          | 131.0           | 1142.8         |                                   | 136                                  | 2.16                                                                                       | 1062                              | 0.485                                               |
|                                                  |                                  | 2.90                                                                                          | 1067.3 | 6978.3          | 124.4           | 1164.2         |                                   | 129                                  | 2.05                                                                                       | 938                               | 0.521                                               |
|                                                  |                                  | 2.09                                                                                          | 1160.8 | 5939.4          | 126.0           | 1261.0         |                                   | 132                                  | 2.30                                                                                       | 1028                              | 0.532                                               |
|                                                  |                                  | 1.05                                                                                          | 1073.9 | 3505.6          | 118.6           | 1355.7         |                                   | 128                                  | 2.34                                                                                       | 946                               | 0.589                                               |
|                                                  |                                  |                                                                                               |        |                 |                 |                |                                   |                                      |                                                                                            |                                   |                                                     |
|                                                  | 50                               | 3.56                                                                                          | 875.0  | 7168.9          | 115.0           | 1490.5         | 59                                | 122                                  | 1.78                                                                                       | 753                               | 0.565                                               |
|                                                  |                                  | 2.62                                                                                          | 869.5  | 5559.1          | 115.9           | 1695.7         |                                   | 125                                  | 1.81                                                                                       | 745                               | 0.579                                               |
|                                                  |                                  | 2.30                                                                                          | 910.8  | 4886.7          | 116.8           | 1627.1         |                                   | 128                                  | 1.76                                                                                       | 783                               | 0.535                                               |
|                                                  |                                  | 2.06                                                                                          | 934.9  | 4420.1          | 127.5           | 1754.9         |                                   | 143                                  | 1.72                                                                                       | 792                               | 0.520                                               |
|                                                  |                                  | 1.44                                                                                          | 848.8  | 3333.8          | 112.2           | 1841.5         |                                   | 128                                  | 1.76                                                                                       | 721                               | 0.582                                               |
|                                                  |                                  | 0.948                                                                                         | 849.3  | 2459.0          | 107.7           | 1780.2         |                                   | 130                                  | 1.75                                                                                       | 720                               | 0.579                                               |
|                                                  |                                  |                                                                                               |        |                 |                 |                |                                   |                                      |                                                                                            |                                   |                                                     |
|                                                  | 25                               | 3.69                                                                                          | 760.7  | 5872.9          | 185.7           | 1496.0         | 84                                | 197                                  | 1.41                                                                                       | 564                               | 0.597                                               |
|                                                  |                                  | 2.90                                                                                          | 706.0  | 4640.3          | 151.4           | 1508.0         |                                   | 161                                  | 1.38                                                                                       | 545                               | 0.604                                               |

|                                                 |     |       |        |         |         |        |     |        |      |     |       |
|-------------------------------------------------|-----|-------|--------|---------|---------|--------|-----|--------|------|-----|-------|
|                                                 |     | 2.29  | 783.3  | 4010.2  | 174.6   | 1693.8 |     | 191    | 1.45 | 592 | 0.584 |
|                                                 |     | 1.60  | 708.5  | 2876.6  | 148.2   | 1657.4 |     | 164    | 1.39 | 544 | 0.610 |
|                                                 |     | 0.756 | 702.1  | 1761.4  | 141.2   | 1667.1 |     | 170    | 1.48 | 532 | 0.661 |
|                                                 |     |       |        |         |         |        |     |        |      |     |       |
|                                                 | 15  | 8.80  | 782.1  | 10018.0 | 307.2   | 2093.9 | 126 | 316    | 1.07 | 466 | 0.548 |
|                                                 |     | 6.56  | 845.2  | 8047.7  | 342.8   | 2166.8 |     | 358    | 1.13 | 488 | 0.553 |
|                                                 |     | 5.83  | 896.6  | 7221.8  | 382.2   | 2317.4 |     | 402    | 1.13 | 494 | 0.545 |
|                                                 |     | 4.04  | 730.5  | 4844.6  | 300.2   | 2485.1 |     | 318    | 1.06 | 413 | 0.613 |
|                                                 |     | 2.40  | 802.0  | 3456.0  | 302.2   | 2587.2 |     | 333    | 1.18 | 469 | 0.600 |
|                                                 |     | 1.93  | 714.4  | 2646.5  | 287.3   | 2652.0 |     | 320    | 1.08 | 394 | 0.657 |
| Global fit: $K_p(308\text{ K}) = 0.57 \pm 0.02$ |     |       |        |         |         |        |     |        |      |     |       |
| 296                                             | 500 | 1.36  | 1295.7 | 4901.1  | 674.4   | 2515.4 | 16  | 770    | 3.14 | 525 | 1.48  |
|                                                 |     | 3.02  | 360.6  | 9425.3  | -63.8   | 2504.7 |     | -      | 2.97 | 428 | 1.72  |
|                                                 |     | 0.96  | 1134.4 | 3510.5  | 588.2   | 2900.5 |     | 694    | 3.07 | 440 | 1.73  |
|                                                 |     | 3.42  | 2177.5 | 10515.0 | 1592.6  | 2504.7 |     | 1686   | 2.90 | 492 | 1.46  |
|                                                 |     | 2.42  | 678.6  | 7863.4  | 181.1   | 2843.8 |     | 192    | 3.03 | 486 | 1.55  |
|                                                 |     | 1.88  | 510.1  | 110.5   | 6097.9  | 2644.5 |     | -      | 3.02 | -   | -     |
|                                                 |     |       |        |         |         |        |     |        |      |     |       |
|                                                 | 200 | 5.37  | -13.77 | 15298.0 | -465.6  | 3150.4 | 16  | -      | 2.76 | 467 | 1.47  |
|                                                 |     | 3.45  | 1288   | 10302.0 | 591.1   | 3348.5 |     | 633    | 2.78 | 655 | 1.05  |
|                                                 |     | 1.68  | 681.7  | 5052.5  | 185.3   | 3547.0 |     | 204    | 2.70 | 478 | 1.40  |
|                                                 |     | 2.66  | 700.0  | 7425.6  | 182.9   | 3555.3 |     | 196    | 2.59 | 505 | 1.27  |
|                                                 |     |       |        |         |         |        |     |        |      |     |       |
|                                                 | 100 | 1.00  | 554.1  | 2891.7  | 126.7   | 3937.2 | 30  | 144    | 2.42 | 411 | 1.47  |
|                                                 |     | 2.16  | 564.6  | 5672.2  | 135.9   | 3733.1 |     | 145    | 2.42 | 420 | 1.43  |
|                                                 |     | 4.74  | 1327.1 | 11737.0 | 861.9   | 3462.9 |     | 896    | 2.37 | 431 | 1.37  |
|                                                 |     | 3.68  | 2219.9 | 9716.4  | 1452.5  | 3556.1 |     | -      | 2.42 | -   | -     |
|                                                 |     | 6.58  | -905.1 | 16505.0 | -1156.8 | 3272.7 |     | -      | 2.47 | -   | -     |
|                                                 |     |       |        |         |         |        |     |        |      |     |       |
|                                                 | 100 | 4.11  | 1071.8 | 10447.0 | 472.0   | 3621.8 | 78  | 496    | 2.38 | 576 | 1.02  |
|                                                 |     | 2.31  | 671.41 | 6034.5  | 197.1   | 3953.9 |     | 207    | 2.37 | 464 | 1.27  |
|                                                 |     | 1.05  | 611.99 | 3064.8  | 166.9   | 3967.0 |     | 182    | 2.41 | 430 | 1.39  |
|                                                 |     | 3.27  | 870.93 | 500.3   | 7891.7  | 3443.6 |     | 521    | 2.27 | 350 | 1.61  |
|                                                 |     | 2.58  | 677.36 | 6987.9  | 179.7   | 3163.4 |     | 188    | 2.49 | 490 | 1.26  |
|                                                 |     | 5.62  | 6984.5 | 13730.0 | 6440.8  | 3459.5 |     | -      | 2.33 | -   | -     |
|                                                 |     | 4.71  | 3191   | 11752.0 | 2434.8  | 3448.3 |     | -      | 2.32 | -   | -     |
|                                                 |     |       |        |         |         |        |     |        |      |     |       |
|                                                 | 50  | 1.33  | 456.2  | 3062.6  | 92.8    | 2827.7 | 33  | 101    | 2.00 | 355 | 1.40  |
|                                                 |     | 2.60  | 300.47 | -26.0   | 5604.5  | 2624.0 |     | -      | 2.02 | 330 | 1.52  |
|                                                 |     | 2.00  | 300.5  | 4342.0  | 77.4    | 2499.3 |     | 81     | 1.98 | 335 | 1.47  |
|                                                 |     | 0.92  | 444.3  | 2268.5  | 96.3    | 2701.7 |     | 108    | 2.05 | 336 | 1.52  |
|                                                 |     |       |        |         |         |        |     |        |      |     |       |
|                                                 | 25  | 2.20  | 448.23 | 3733.9  | 157.1   | 3417.7 | 43  | 167    | 1.55 | 281 | 1.36  |
|                                                 |     | 0.85  | 425.9  | 1585.1  | 152.9   | 3557.4 |     | 177    | 1.50 | 249 | 1.49  |
|                                                 |     | 3.34  | 876.53 | 5364.3  | 561.73  | 3037.2 |     | 594    | 1.50 | 282 | 1.32  |
|                                                 |     | 4.25  | -1157  | 6464.5  | -1243.9 | 2773.9 |     | -      | 1.49 | -   | -     |
|                                                 |     |       |        |         |         |        |     |        |      |     |       |
|                                                 | 15  | 1.60  | 494.9  | 2436.4  | 237.8   | 3904.2 | 61  | 259    | 1.32 | 236 | 1.39  |
|                                                 |     | 2.57  | 668.5  | 3792.0  | 369.7   | 3658.5 |     | 396    | 1.34 | 272 | 1.22  |
|                                                 |     | 3.56  | -474.7 | 4385.0  | 585.3   | 3434.8 |     | -      | 1.18 | -   | -     |
|                                                 |     | 5.39  | 409    | 6637.7  | 264.7   | 2809.2 |     | -      | 1.19 | -   | -     |
| Global fit: $K_p(296\text{ K}) = 1.41 \pm 0.06$ |     |       |        |         |         |        |     |        |      |     |       |
| 283                                             | 500 | 2.99  | 3553.4 | 11376.0 | 3091.7  | 1667.0 | 12  | 3222.2 | 3.65 | 331 | 2.86  |
|                                                 |     | 2.04  | 2143.4 | 7160.7  | 1879.4  | 1733.5 |     | 1951   | 3.38 | 192 | 4.56  |
|                                                 |     | 1.61  | 2091.3 | 1803.2  | 5699.1  | 1780.8 |     | 1898.8 | 3.35 | 193 | 4.52  |
|                                                 |     |       |        |         |         |        |     |        |      |     |       |
|                                                 | 200 | 1.27  | 389.9  | 4082.9  | 212.8   | 2696.7 | 6   | 222    | 3.07 | 168 | 4.76  |
|                                                 |     | 0.55  | 311.8  | 1901.4  | 137.3   | 2555.5 |     | 151    | 3.13 | 161 | 5.04  |
|                                                 |     | 1.86  | 4342.3 | 6096.5  | 3868.9  | 2773.9 |     | 4195   | 3.02 | 148 | 5.30  |
|                                                 |     | 3.22  | 3995.8 | 10841.0 | 3621.1  | 2654.7 |     | 3751   | 3.24 | 245 | 3.43  |
|                                                 |     | 2.63  | 3657.3 | 3654.3  | 7958.6  | 2535.7 |     | -      | 3.02 | -   | -     |
|                                                 |     |       |        |         |         |        |     |        |      |     |       |
|                                                 | 100 | 0.83  | 261.5  | 2422.0  | 116.7   | 3053   | 15  | 123    | 2.72 | 138 | 4.87  |
|                                                 |     | 1.52  | 2052.4 | 4239.0  | 1780.6  | 3138.6 |     | 1902   | 2.61 | 150 | 4.30  |
|                                                 |     | 1.22  | 740.7  | 3592.1  | 569.0   | 3141.5 |     | 597    | 2.79 | 144 | 4.82  |
|                                                 |     | 2.01  | 3005.7 | 6072.9  | 2568.6  | 3153.9 |     | 2767   | 2.80 | 239 | 2.91  |

|                                                 |    |      |        |        |        |        |    |        |      |       |      |
|-------------------------------------------------|----|------|--------|--------|--------|--------|----|--------|------|-------|------|
|                                                 |    | 3.30 | -16588 | 9164.8 | -16589 | 2927.6 |    | -      | 2.77 | -     | -    |
|                                                 | 50 | 0.65 | 459.4  | 1805.4 | 280.0  | 1772.2 | 26 | 308    | 2.45 | 151   | 4.03 |
|                                                 |    | 1.70 | 767.4  | 521.3  | 4380.3 | 1649.6 |    | 551    | 2.41 | 216   | 2.76 |
|                                                 |    | 1.20 | 497.1  | 3082.7 | 305.2  | 1740.7 |    | 324    | 2.38 | 173   | 3.41 |
|                                                 |    | 2.04 | 2917.5 | 2779.4 | 4874.2 | 1705.7 |    | -      | 2.31 | -     | -    |
|                                                 |    | 3.06 | 1200.8 | 8081.5 | 811.7  | 1641.3 |    | -      | 2.51 | -     | -    |
|                                                 | 25 | 0.82 | 736.5  | 1985.4 | 499.6  | 2082.9 | 34 | 564    | 2.08 | 173   | 3.13 |
|                                                 |    | 0.48 | 283.5  | 1152.8 | 164.3  | 2317.3 |    | 180    | 2.06 | 104   | 5.17 |
|                                                 |    | 1.16 | 1054.9 | 2678.2 | 778.8  | 2173.9 |    | 866    | 2.04 | 189   | 2.80 |
|                                                 |    | 2.56 | 1663.3 | 1219.4 | 5882.2 | 2001.3 |    | -      | 2.11 | -     | -    |
|                                                 |    | 1.86 | 2828   | 4740.1 | 2042.3 | 2113.4 |    | -      | 2.11 | -     | -    |
|                                                 |    | 3.96 | 3810.9 | 4957.4 | 6121.0 | 1923   |    | -      | 1.83 | -     | -    |
|                                                 | 15 | 1.20 | 971.8  | 2127.6 | 799.2  | 3276   | 42 | 2883.9 | 1.59 | 104.2 | 3.97 |
|                                                 |    | 0.75 | 236.9  | 1276.7 | 172.1  | 3389.9 |    | 179.4  | 1.56 | 57.6  | 7.05 |
|                                                 |    | 1.48 | 1319.3 | 2602.2 | 1106.0 | 3288.2 |    | 1202.7 | 1.58 | 116.6 | 3.52 |
|                                                 |    | 1.81 | 6326.1 | 6431.2 | 2674.0 | 3264.4 |    | -      | 1.52 | -     | -    |
|                                                 |    | 2.38 | 4916.7 | 5424.7 | 3349.1 | 3073.4 |    | -      | 1.60 | -     | -    |
| Global fit: $K_p(283\text{ K}) = 4.16 \pm 0.49$ |    |      |        |        |        |        |    |        |      |       |      |

**Table S2.** Summary of experimental conditions, fit parameters, and kinetic results obtained in this work for the Cl + C<sub>4</sub>H<sub>2</sub>O<sub>3</sub> (MA) ↔ C<sub>4</sub>H<sub>2</sub>O<sub>3</sub>Cl• (adduct) reaction with He bath gas

| Temperature (K)                                  | Pressure (Torr, He) | [C <sub>4</sub> H <sub>2</sub> O <sub>3</sub> ] (10 <sup>14</sup> molecule cm <sup>-3</sup> ) | Q       | -λ <sub>1</sub> | -λ <sub>2</sub> | S <sub>0</sub> | k <sub>d</sub> (s <sup>-1</sup> ) | k <sub>L,loss</sub> (s <sup>-1</sup> ) | k <sub>f</sub> (10 <sup>-11</sup> cm <sup>3</sup> molecule <sup>-1</sup> s <sup>-1</sup> ) | k <sub>r</sub> (s <sup>-1</sup> ) | K <sub>p</sub> (10 <sup>6</sup> atm <sup>-1</sup> ) |
|--------------------------------------------------|---------------------|-----------------------------------------------------------------------------------------------|---------|-----------------|-----------------|----------------|-----------------------------------|----------------------------------------|--------------------------------------------------------------------------------------------|-----------------------------------|-----------------------------------------------------|
| 323                                              | 300                 | 3.58                                                                                          | 3024.5  | 10050.7         | 149.0           | 3381.6         | 59                                | 185                                    | 1.99                                                                                       | 2839                              | 0.159                                               |
|                                                  |                     | 3.18                                                                                          | 2964.6  | 8989.2          | 154.9           | 3559.3         |                                   | 199                                    | 1.92                                                                                       | 2765                              | 0.158                                               |
|                                                  |                     | 2.55                                                                                          | 2894.1  | 7657.9          | 146.8           | 3518.1         |                                   | 196                                    | 1.90                                                                                       | 2698                              | 0.160                                               |
|                                                  |                     | 2.01                                                                                          | 2827.0  | 6668.3          | 133.9           | 2938.5         |                                   | 186                                    | 1.95                                                                                       | 2641                              | 0.168                                               |
|                                                  |                     | 1.27                                                                                          | 2738.1  | 5051.3          | 134.3           | 3644.4         |                                   | 216                                    | 1.89                                                                                       | 2522                              | 0.170                                               |
|                                                  | 100                 | 3.63                                                                                          | 1891.4  | 6614.6          | 85.7            | 3546.6         | 48                                | 100                                    | 1.31                                                                                       | 1791                              | 0.166                                               |
|                                                  |                     | 3.23                                                                                          | 1920.3  | 6095.1          | 84.5            | 3466.5         |                                   | 100                                    | 1.30                                                                                       | 1820                              | 0.163                                               |
|                                                  |                     | 2.56                                                                                          | 1856.4  | 5012.3          | 83.9            | 3312.1         |                                   | 104                                    | 1.25                                                                                       | 1752                              | 0.162                                               |
|                                                  |                     | 1.97                                                                                          | 1885.2  | 4462.9          | 83.6            | 3470.0         |                                   | 108                                    | 1.32                                                                                       | 1777                              | 0.169                                               |
|                                                  |                     | 0.91                                                                                          | 1841.0  | 3016.2          | 78.8            | 4293.9         |                                   | 124                                    | 1.33                                                                                       | 1717                              | 0.176                                               |
| Global fit: K <sub>p</sub> (323 K) = 0.17 ± 0.01 |                     |                                                                                               |         |                 |                 |                |                                   |                                        |                                                                                            |                                   |                                                     |
| 308                                              | 100                 | 5.81                                                                                          | 870.8   | 10003.0         | 110.9           | 4087.8         | 120                               | 110.2                                  | 1.57                                                                                       | 760.7                             | 0.492                                               |
|                                                  |                     | 5.49                                                                                          | 860.3   | 9375.4          | 125.4           | 4136.5         |                                   | 125.8                                  | 1.55                                                                                       | 734.4                             | 0.504                                               |
|                                                  |                     | 4.22                                                                                          | 849.5   | 7311.9          | 120.2           | 4810.7         |                                   | 120.2                                  | 1.53                                                                                       | 729.3                             | 0.501                                               |
|                                                  |                     | 3.04                                                                                          | 835.6   | 5883.4          | 127.9           | 4977.6         |                                   | 129.0                                  | 1.66                                                                                       | 706.6                             | 0.562                                               |
|                                                  |                     | 2.40                                                                                          | 830.1   | 4792.6          | 117.8           | 4732.0         |                                   | 117.3                                  | 1.65                                                                                       | 712.8                             | 0.552                                               |
|                                                  |                     | 1.13                                                                                          | 815.8   | 2680.3          | 115.3           | 4971.3         |                                   | 113.5                                  | 1.65                                                                                       | 702.2                             | 0.559                                               |
| Global fit: K <sub>p</sub> (308 K) = 0.53 ± 0.03 |                     |                                                                                               |         |                 |                 |                |                                   |                                        |                                                                                            |                                   |                                                     |
| 296                                              | 500                 | 2.49                                                                                          | 2101.2  | 7617.5          | 1473.8          | 1328.6         | 124                               | 1597                                   | 2.76                                                                                       | 504                               | 1.36                                                |
|                                                  |                     | 2.15                                                                                          | 720.0   | 6823.9          | 222.5           | 1776.7         |                                   | 230                                    | 2.89                                                                                       | 490                               | 1.46                                                |
|                                                  |                     | 1.75                                                                                          | 792.3   | 5843.7          | 240.3           | 2043.6         |                                   | 253                                    | 2.96                                                                                       | 540                               | 1.36                                                |
|                                                  |                     | 1.33                                                                                          | 775.9   | 4582.9          | 264.2           | 1693.9         |                                   | 282                                    | 2.96                                                                                       | 493                               | 1.49                                                |
|                                                  |                     | 0.97                                                                                          | 704.3   | 3330.0          | 205.4           | 1760.8         |                                   | 220                                    | 2.79                                                                                       | 484                               | 1.40                                                |
|                                                  | 300                 | 5.83                                                                                          | 614.9   | 1946.3          | 159.9           | 3725.7         | 37                                | 198                                    | 2.49                                                                                       | 416                               | 1.48                                                |
|                                                  |                     | 3.64                                                                                          | 645.0   | 9486.8          | 184.7           | 4153.3         |                                   | 192                                    | 2.47                                                                                       | 453                               | 1.35                                                |
|                                                  |                     | 3.16                                                                                          | 665.7   | 8261.1          | 178.7           | 3882.5         |                                   | 188                                    | 2.45                                                                                       | 478                               | 1.27                                                |
|                                                  |                     | 2.45                                                                                          | 648.6   | 6548.2          | 178.5           | 4223.2         |                                   | 190                                    | 2.46                                                                                       | 459                               | 1.33                                                |
|                                                  |                     | 2.20                                                                                          | 624.0   | 5741.6          | 167.6           | 3720.3         |                                   | 179                                    | 2.38                                                                                       | 445                               | 1.33                                                |
| 100                                              | 1.69                | 616.7                                                                                         | 4624.2  | 174.1           | 3360.0          |                | 189                               | 2.45                                   | 428                                                                                        | 1.42                              |                                                     |
|                                                  | 0.95                | 604.1                                                                                         | 2780.8  | 163.1           | 3390.2          |                | 187                               | 2.42                                   | 417                                                                                        | 1.44                              |                                                     |
|                                                  | 9.12                | 310.7                                                                                         | 15617.8 | 45.7            | 5538.2          | 106            | 45                                | 1.67                                   | 266                                                                                        | 1.56                              |                                                     |
|                                                  | 6.88                | 392.2                                                                                         | 12001.5 | 80.4            | 7102.7          |                | 80                                | 1.68                                   | 312                                                                                        | 1.34                              |                                                     |
|                                                  | 4.91                | 432.2                                                                                         | 8773.2  | 119.0           | 7737.3          |                | 120                               | 1.70                                   | 312                                                                                        | 1.35                              |                                                     |
| 100                                              | 3.36                | 417.3                                                                                         | 6276.2  | 112.7           | 9118.3          |                | 113                               | 1.74                                   | 304                                                                                        | 1.42                              |                                                     |
|                                                  | 1.66                | 390.4                                                                                         | 3453.9  | 87.2            | 9518.9          |                | 85                                | 1.83                                   | 305                                                                                        | 1.49                              |                                                     |
|                                                  | 0.97                | 419.6                                                                                         | 2126.3  | 112.0           | 8322.6          |                | 113                               | 1.76                                   | 306                                                                                        | 1.42                              |                                                     |
|                                                  | 4.43                | 456.2                                                                                         | 7923.5  | 123.4           | 2845.3          | 69             | 126                               | 1.70                                   | 330                                                                                        | 1.27                              |                                                     |
|                                                  | 3.16                | 442.8                                                                                         | 6127.7  | 90.3            | 2002.2          |                | 92                                | 1.81                                   | 351                                                                                        | 1.28                              |                                                     |
| 100                                              | 3.06                | 436.1                                                                                         | 5535.8  | 120.9           | 2986.0          |                | 124                               | 1.68                                   | 312                                                                                        | 1.34                              |                                                     |
|                                                  | 2.04                | 418.8                                                                                         | 4010.4  | 76.5            | 2080.2          |                | 77                                | 1.76                                   | 342                                                                                        | 1.28                              |                                                     |
|                                                  | 1.03                | 401.1                                                                                         | 2219.0  | 82.2            | 2147.4          |                | 84                                | 1.77                                   | 317                                                                                        | 1.39                              |                                                     |
|                                                  | 0.95                | 422.5                                                                                         | 1903.9  | 121.9           | 3275.2          |                | 132                               | 1.62                                   | 290                                                                                        | 1.38                              |                                                     |
|                                                  | 3.03                | 448.9                                                                                         | 5480.0  | 151.8           | 2494.2          | 80             | 156                               | 1.68                                   | 293                                                                                        | 1.43                              |                                                     |
| 100                                              | 2.11                | 466.2                                                                                         | 4164.9  | 145.4           | 2673.2          |                | 151                               | 1.78                                   | 315                                                                                        | 1.40                              |                                                     |
|                                                  | 3.03                | 448.9                                                                                         | 5480.0  | 151.9           | 2494.2          |                | 156                               | 1.68                                   | 293                                                                                        | 1.43                              |                                                     |
|                                                  | 1.24                | 473.3                                                                                         | 2596.4  | 146.8           | 2908.0          |                | 157                               | 1.77                                   | 317                                                                                        | 1.39                              |                                                     |
|                                                  | 3.94                | 369.5                                                                                         | 5637.7  | 98.2            | 1914.0          | 63             | 100                               | 1.35                                   | 270                                                                                        | 1.24                              |                                                     |
|                                                  | 3.63                | 369.7                                                                                         | 5078.5  | 91.8            | 1857.6          |                | 94                                | 1.30                                   | 276                                                                                        | 1.17                              |                                                     |
| 50                                               | 2.93                | 322.6                                                                                         | 3967.3  | 101.6           | 2089.3          |                | 104                               | 1.26                                   | 219                                                                                        | 1.42                              |                                                     |
|                                                  | 2.73                | 342.9                                                                                         | 3858.8  | 86.5            | 1816.2          |                | 88                                | 1.30                                   | 255                                                                                        | 1.26                              |                                                     |
|                                                  | 1.67                | 333.9                                                                                         | 2524.3  | 87.1            | 1782.9          |                | 90                                | 1.33                                   | 244                                                                                        | 1.34                              |                                                     |
| Global fit: K <sub>p</sub> (296 K) = 1.37 ± 0.03 |                     |                                                                                               |         |                 |                 |                |                                   |                                        |                                                                                            |                                   |                                                     |

**Table S3.** Computed CBS-QB3 enthalpies at 298 K (in au) and B3LYP/6-311G(2d,d,p) geometries (atomic number and Cartesian coordinates in  $10^{-10}$  m) for Cl, C<sub>4</sub>H<sub>2</sub>O<sub>3</sub> (MA) and C<sub>4</sub>H<sub>2</sub>O<sub>3</sub>•Cl (adduct).

For C<sub>4</sub>H<sub>2</sub>O<sub>3</sub> (MA), the rotational constants are B = 6.86, 2.46 and 1.81 GHz.

For C<sub>4</sub>H<sub>2</sub>O<sub>3</sub>•Cl (adduct), the rotational constants are B = 2.80, 1.44 and 1.04 GHz.

**Cl atom**

CBS-QB3 Enthalpy= -459.681232

**Maleic anhydride**

CBS-QB3 Enthalpy = -378.780589

|   |             |              |              |
|---|-------------|--------------|--------------|
| 6 | 0.000000000 | 1.131875000  | 0.159628000  |
| 6 | 0.000000000 | 0.665536000  | -1.256735000 |
| 6 | 0.000000000 | -0.665536000 | -1.256735000 |
| 6 | 0.000000000 | -1.131875000 | 0.159628000  |
| 8 | 0.000000000 | 0.000000000  | 0.971021000  |
| 8 | 0.000000000 | -2.238041000 | 0.598153000  |
| 8 | 0.000000000 | 2.238041000  | 0.598153000  |
| 1 | 0.000000000 | 1.356406000  | -2.086671000 |
| 1 | 0.000000000 | -1.356406000 | -2.086671000 |

**Cl adduct**

CBS-QB3 Enthalpy = -838.491388

|    |              |              |              |
|----|--------------|--------------|--------------|
| 6  | -1.618170000 | -0.386090000 | -0.038391000 |
| 6  | -0.525931000 | -1.077731000 | 0.616960000  |
| 6  | 0.638620000  | -0.188314000 | 0.687514000  |
| 6  | 0.097264000  | 1.138565000  | 0.124657000  |
| 8  | -1.193034000 | 0.932542000  | -0.310253000 |
| 8  | 0.648259000  | 2.186547000  | 0.063652000  |
| 8  | -2.715952000 | -0.762210000 | -0.325777000 |
| 1  | -0.580051000 | -2.105350000 | 0.942027000  |
| 1  | 1.084920000  | -0.051442000 | 1.671889000  |
| 17 | 2.001780000  | -0.800989000 | -0.375255000 |

**Table S4.** Computed B3LYP/6-311G(2d,d,p) vibrational frequencies for C<sub>4</sub>H<sub>2</sub>O<sub>3</sub> (MA) and C<sub>4</sub>H<sub>2</sub>O<sub>3</sub>Cl• (Cl adduct), in cm<sup>-1</sup> and scaled by 0.99.

| Maleic anhydride | Cl - MA adduct |
|------------------|----------------|
| 165              | 63             |
| 258              | 147            |
| 400              | 191            |
| 554              | 305            |
| 630              | 394            |
| 639              | 525            |
| 692              | 562            |
| 768              | 586            |
| 853              | 605            |
| 862              | 700            |
| 892              | 724            |
| 975              | 789            |
| 1036             | 846            |
| 1065             | 910            |
| 1246             | 1009           |
| 1314             | 1051           |
| 1637             | 1175           |
| 1836             | 1220           |
| 1896             | 1276           |
| 3200             | 1304           |
| 3221             | 1762           |
|                  | 1896           |
|                  | 3075           |
|                  | 3218           |

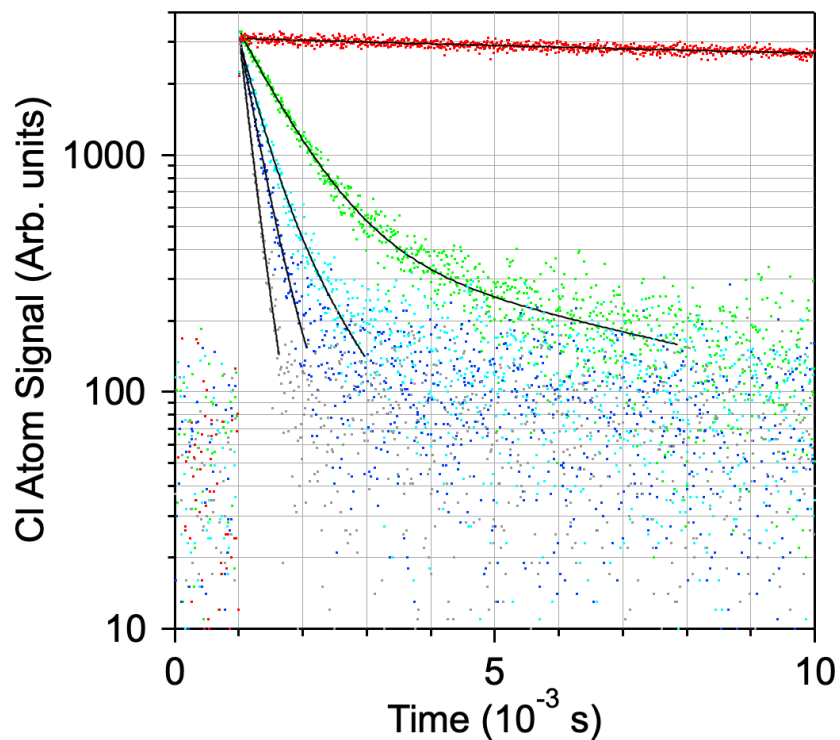

**Figure S1.** Representative Cl atom temporal profiles obtained for a range of  $C_4H_2O_3$  (MA) concentrations at 283 K and 100 Torr ( $N_2$ ). MA concentrations from top to bottom are ( $10^{14}$  molecule  $cm^{-3}$ ): 0, 0.37, 0.83, 1.22, and 2.01. The lines for profiles with MA present are non-linear least-squares fits of the data to eq. I. Fit results are given in **Table S1**.



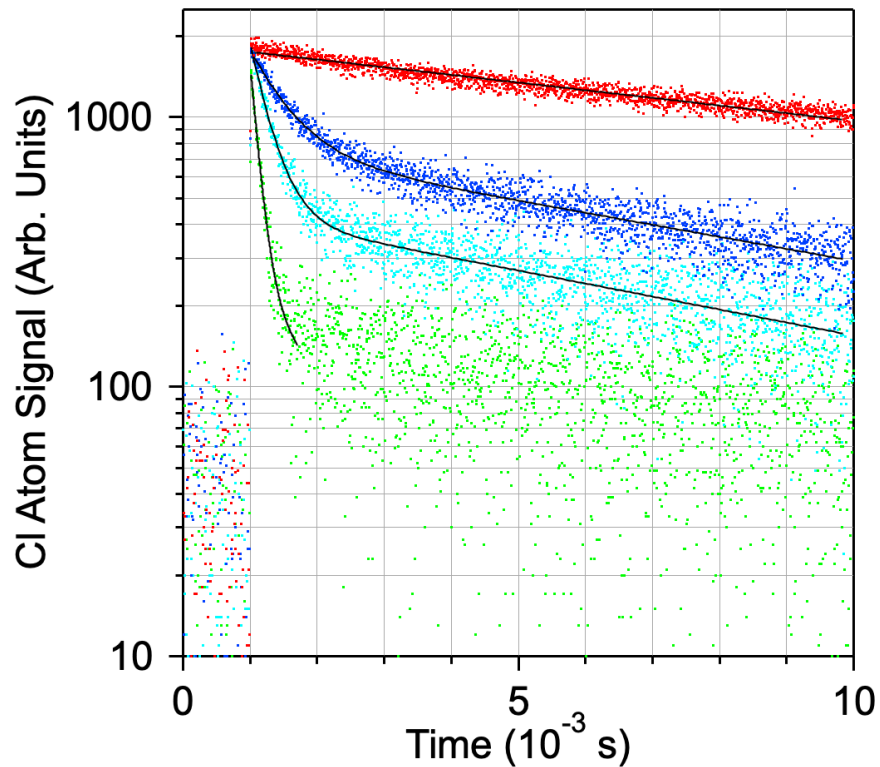

**Figure S2.** Representative Cl atom temporal profiles obtained for a range of  $C_4H_2O_3$  (MA) concentrations at 308 K and 50 Torr ( $N_2$ ). MA concentrations from top to bottom are ( $10^{14}$  molecule  $cm^{-3}$ ): 0, 0.57, 1.44, and 3.56. The lines for profiles with MA present are non-linear least-squares fits of the data to eq. I. Fit results are given in **Table S1**.

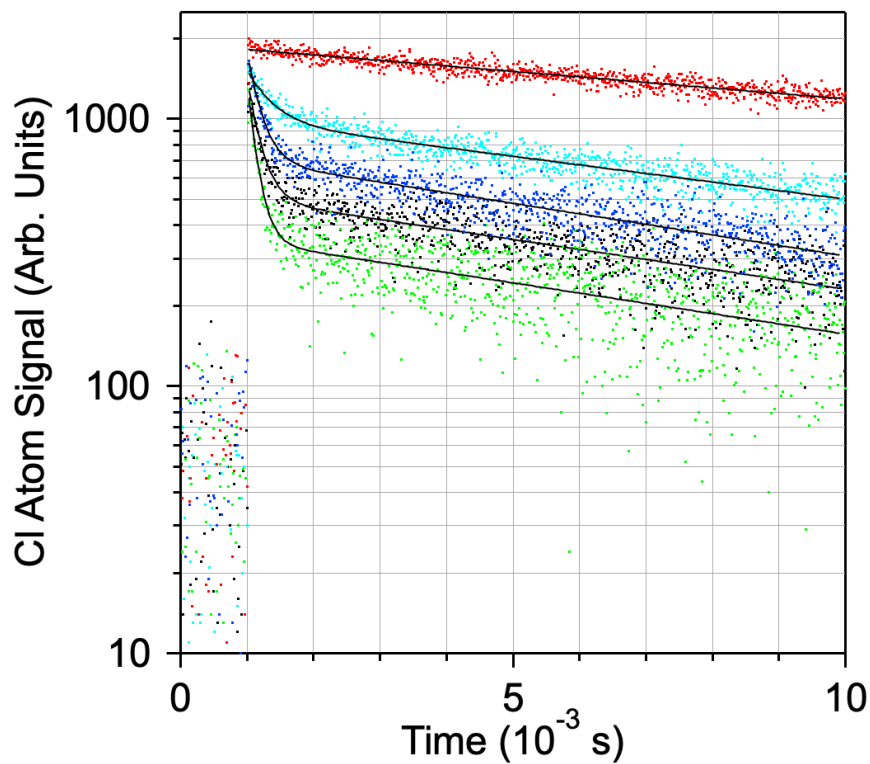

**Figure S3.** Representative Cl atom temporal profiles obtained for a range of  $C_4H_2O_3$  (MA) concentrations at 323 K and 50 Torr ( $N_2$ ). MA concentrations from top to bottom are ( $10^{14}$  molecule  $cm^{-3}$ ): 0, 0.67, 1.86, 2.51 and 4.02. The lines for profiles with MA present are non-linear least-squares fits of the data to eq. I. Fit results are given in **Table S1**.

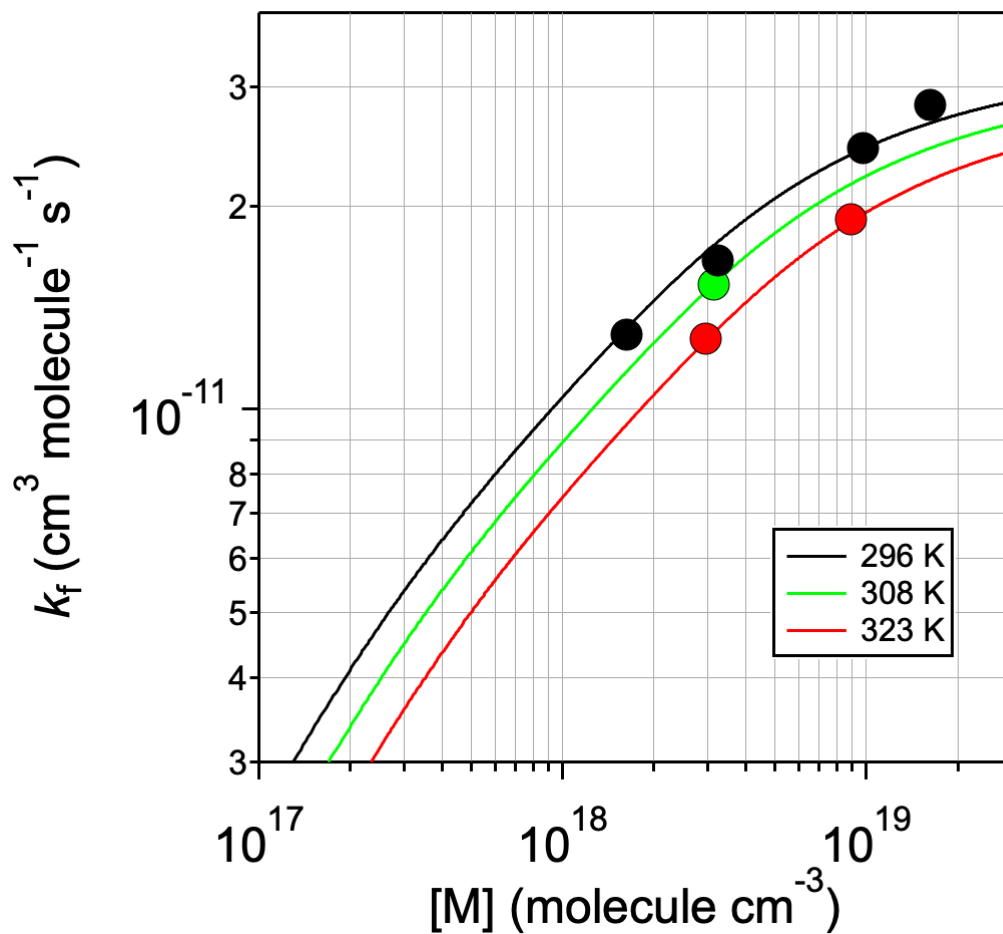

**Figure S4.** Fall-off data for the Cl + C<sub>4</sub>H<sub>2</sub>O<sub>3</sub> (MA) + M (He) reaction. Lines are a least-squares fit of the data (see **Table S2**) using the rate coefficient parameters for N<sub>2</sub> data after incorporating a collision efficiency ratio of 0.34.

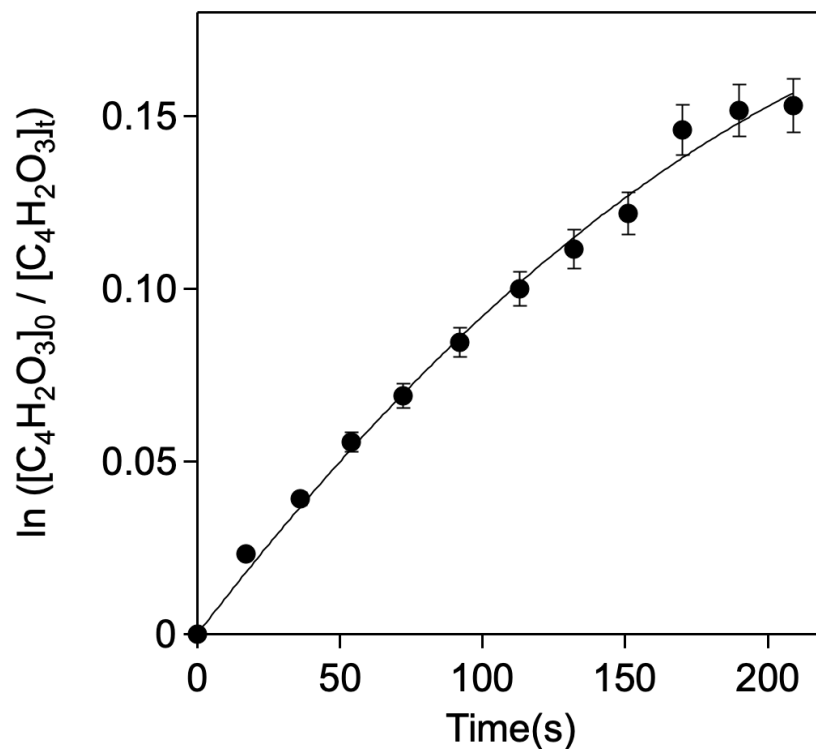

**Figure S5.** A representative measurement of the dark loss of  $C_4H_2O_3$  (MA) in the relative rate apparatus, i.e., in the absence of Cl atom. The line is an empirical second-order polynomial least-squares fit of the data used to correct for MA loss in the relative rate kinetic measurement, e.g. see **Figure 3** in the text for the magnitude of the dark loss correction. MA loss measurements performed before and after each kinetic measurement were consistent to within 3%.

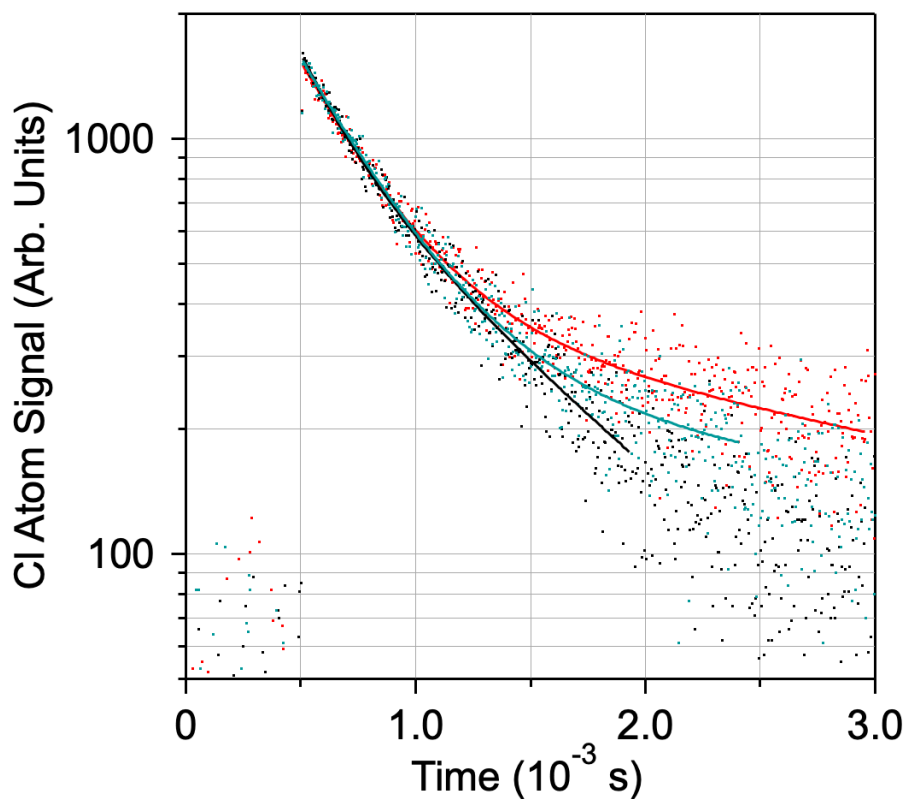

**Figure S6.** Representative Cl atom temporal profiles obtained for a range of O<sub>2</sub> concentrations with a C<sub>4</sub>H<sub>2</sub>O<sub>3</sub> (MA) concentration of  $(6.22 \pm 0.10) \times 10^{13}$  molecule cm<sup>-3</sup> at 296 K and 40 Torr (N<sub>2</sub>). O<sub>2</sub> concentrations from top to bottom profile are (10<sup>14</sup> molecule cm<sup>-3</sup>): 0, 1.27, and 4.03. The lines are non-linear least-squares fits of the data to eq. I. Not all measured Cl atom profiles are shown for clarity, see **Figure 6**.

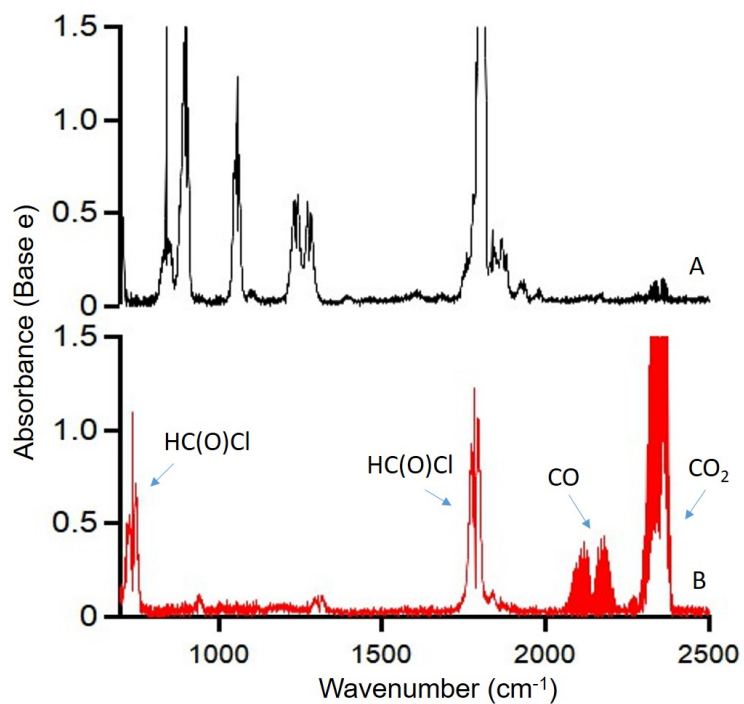

**Figure S7.** Infrared spectra of reaction products formed in the Cl + C<sub>4</sub>H<sub>2</sub>O<sub>3</sub> reaction. Experiments were performed at 296 K with 630 Torr syn. Air bath gas. Panel A is the initial MA spectrum. Note the high initial MA concentration resulted in saturated absorbance at 1805 cm<sup>-1</sup>. Panel B is the spectrum recorded after ~3 mins of reaction with MA subtracted, ~90% MA loss.
